# Supplementary material for: Ammonia and Humidity Sensing by Phthalocyanine–Corrole Complex Heterostructure Devices
Source: MDPI journal article supplement (doi:10.3390/s23156773), 2023-07-28
Supplement: s1 [file s1]

# Ammonia and Humidity Sensing by Phthalocyanine-Corrole Complex Heterostructure Devices

Lorena Di Zazzo <sup>1,2</sup>, Sujithkumar Ganesh Moorthy <sup>1</sup>, Rita Meunier-Prest <sup>1</sup>, Eric Lesniewska <sup>3</sup>,  
Corrado Di Natale <sup>2,\*</sup>, Roberto Paolesse <sup>4</sup> and Marcel Bouvet <sup>1,\*</sup>

**Table S1.** Characteristic Raman bands ( $\text{cm}^{-1}$ ) of  $\text{CuT}(\text{pCH}_3\text{O})\text{PC}$ ,  $\text{CuT}(\text{pF})\text{PC}$  and  $\text{LuPc}_2$  complexes, compared to these of double layer heterojunctions.

| <b>Cu(pmethoxy)TPC<br/>Evaporated powder</b> | <b>MSDI<br/>Cu(pCH<sub>3</sub>O)TPC/LuPc<sub>2</sub></b> | <b>Cu(pF)TPC<br/>Evaporated powder</b> | <b>MSDI<br/>Cu(pF)TPC/LuPc<sub>2</sub></b> | <b>LuPc<sub>2</sub><br/>powder</b> | <b>Assignment</b>                      |
|----------------------------------------------|----------------------------------------------------------|----------------------------------------|--------------------------------------------|------------------------------------|----------------------------------------|
|                                              | 549.322                                                  |                                        |                                            | 547 w                              | Pc breathing                           |
|                                              | 578.16                                                   |                                        |                                            | 578.16 w                           | Pc breathing                           |
|                                              |                                                          | 647.353                                | 645.67                                     |                                    | C-F [1,2]                              |
| 657.67 w                                     | 660.8                                                    |                                        |                                            |                                    | C-C-H in benzene ring                  |
|                                              | 680.97                                                   |                                        |                                            | 680                                |                                        |
|                                              | 739.32                                                   |                                        | 735.995                                    | 734                                | C-H wagging                            |
| 780.813                                      | 782.468                                                  |                                        | 780.813                                    | 779                                | C=N aza stretching                     |
| 815.513                                      |                                                          |                                        |                                            |                                    |                                        |
| 851.73                                       |                                                          |                                        |                                            |                                    |                                        |
| 882.868                                      | 884.505                                                  |                                        |                                            |                                    |                                        |
| 980.507                                      | 982.125                                                  |                                        |                                            |                                    |                                        |
|                                              | 1009.59                                                  | 1016.03                                | 1016.03                                    | 1011                               | C-H binding                            |
| 1054.63                                      | 1054.63                                                  | 1057.83                                | 1056.23                                    | 1046                               |                                        |
| 1075.46                                      | 1075.46                                                  | 1080.26                                | 1080.126                                   |                                    |                                        |
|                                              | 1105.81                                                  |                                        |                                            | 1103                               | C-H binding                            |
|                                              | 1121.75                                                  |                                        | 1121.75                                    | 1121                               |                                        |
|                                              |                                                          |                                        |                                            | 1146                               | Pyrrole breathing                      |
|                                              | 1158.28                                                  |                                        |                                            | 1160                               |                                        |
| 1177.28                                      | 1177.28                                                  | 1177.28                                | 1177.28                                    | 1176                               | C-H bending                            |
| 1193.08                                      | 1196.24                                                  |                                        |                                            |                                    |                                        |
| 1221.45                                      | 1223.02                                                  |                                        |                                            | 1217                               | C-H bending                            |
| 1249.72                                      |                                                          |                                        |                                            |                                    |                                        |
| 1265.39                                      |                                                          | 1263.82                                |                                            |                                    |                                        |
|                                              | 1273.21                                                  |                                        |                                            |                                    |                                        |
| 1290.39                                      | 1291.95                                                  |                                        |                                            |                                    |                                        |
|                                              |                                                          | 1305.98                                | 1304.43                                    | 1301                               | C-H bending                            |
| 1312.12                                      | 1312.21                                                  |                                        |                                            |                                    |                                        |
| 1340.19                                      | 1343.29                                                  | 1340.19                                | 1337.08                                    |                                    | C $\alpha$ -C $\alpha$                 |
| 1363.42 m                                    |                                                          |                                        | 1363.42                                    |                                    | C $\alpha$ -C $\alpha$                 |
| 1402 m                                       | 1406.63                                                  |                                        | 1408.17                                    | 1406.63                            | C $\alpha$ -Cmeso                      |
|                                              |                                                          | 1441.96                                |                                            |                                    | C $\alpha$ -C $\alpha$                 |
| 1486.29 s                                    | 1487.81                                                  | 1501.52                                |                                            |                                    | C $\alpha$ -C $\alpha$                 |
| 1518.24                                      | 1515.2                                                   | 1522.8                                 | 1507.6                                     | 1508                               | Coupling of pyrrole and aza stretching |
|                                              | 1527.35                                                  |                                        | 1528.87                                    |                                    |                                        |
| 1601.35 m                                    | 1599.85                                                  |                                        | 1601.35                                    | 1599.85                            | C=C in benzene ring                    |

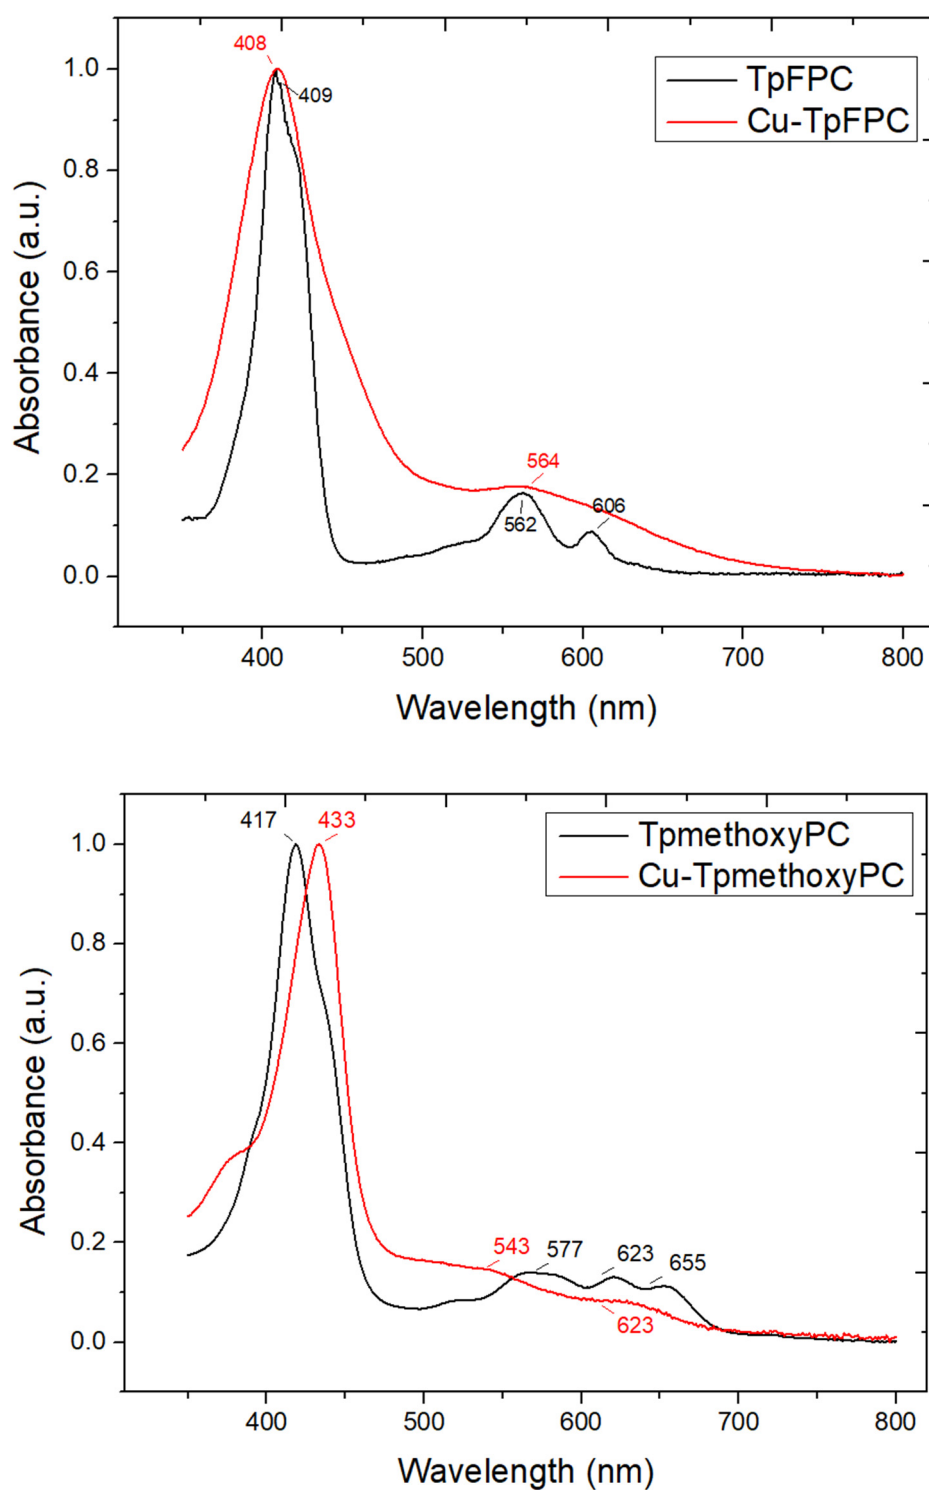

**Figure S1.** UV-visible electronic absorption spectra of **1** (a) and **2** (b) in  $\text{CHCl}_3$  solution (black) compared to the corresponding metal free corroles (red).

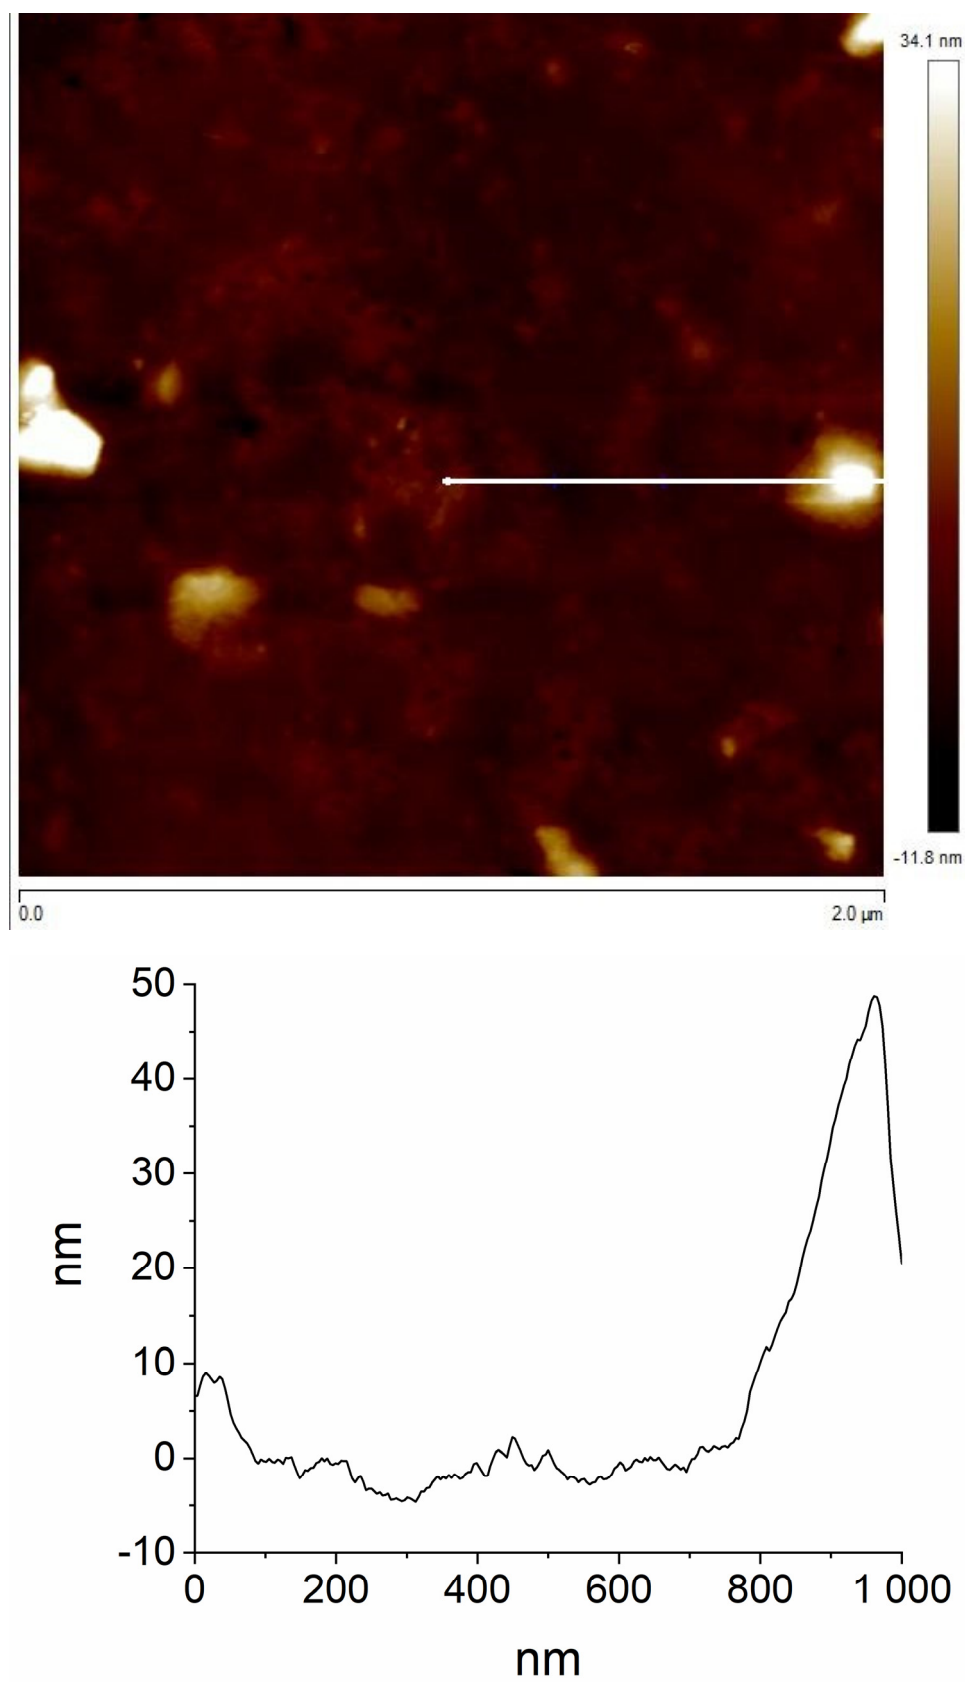

**Figure S2.** AFM images of a particular area of 2/LuPc<sub>2</sub> device, from top to bottom: 2  $\mu\text{m} \times 2\text{ }\mu\text{m}$  2D picture and the profile corresponding to the 1  $\mu\text{m}$ -long line shown on 2D picture, respectively.

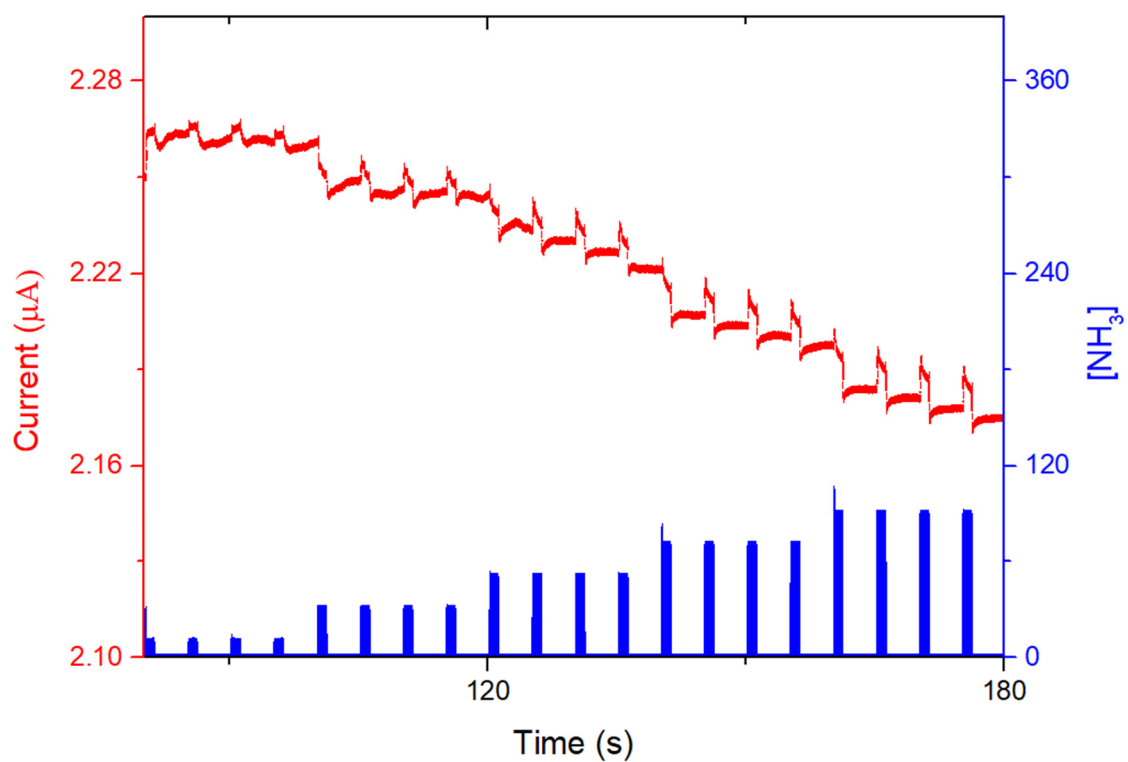

**Figure S3.** Current variation as a function of time of 1/LuPc<sub>2</sub> heterojunction device exposed to NH<sub>3</sub> in the range 10-90 ppm with 1 min/4 min exposure/recovery cycles, at 40% RH and a bias of 3 V.

## References

1. Sharts, C. M.; Gorelik, V. S.; Agoltsov, A. M.; Zlobina, L. I.; Sharts, O. N. Detection of carbon-fluorine bonds in organofluorine compounds by Raman spectroscopy using a copper-vapor laser. *Proc. SPIE-Int. Soc. Opt. Eng.* **1999**, 3537, 317.
2. Mena, F.; Mena, B.; Sharts, O. Development of carbon-fluorine spectroscopy for pharmaceutical and biomedical applications. *Faraday Discussions* **2011**, 149, 269.
